# Supplementary material for: PrP charge structure encodes interdomain interactions
Source: PubMed Central journal article supplement (PMC4555102; doi:10.1038/srep13623), 2015-09-01
Supplement: srep13623-s1.pdf [file srep13623-s1.pdf]

## **PrP charge structure encodes interdomain interactions**

**Javier Martínez<sup>1</sup>, Rosa Sánchez<sup>1</sup>, Milagros Castellanos<sup>2</sup>, Natallia Makarava<sup>3</sup>, Adriano Aguzzi<sup>4</sup>,  
Ilya V. Baskakov<sup>3</sup> and María Gasset<sup>1\*</sup>**

<sup>1</sup>Instituto Química-Física “Rocasolano”, Consejo Superior de Investigaciones Científicas, Madrid 28006, Spain.

<sup>2</sup>Centro Nacional de Biotecnología, Consejo Superior de Investigaciones Científicas, Madrid, Spain; IMDEA-Nanociencia, Madrid 28049, Spain

<sup>3</sup>Center for Biomedical Engineering and Technology, University of Maryland School of Medicine, Baltimore, MD 21201, USA.

<sup>4</sup>Institute of Neuropathology, University Hospital of Zürich, Zürich 8091, Switzerland.

Supplementary Information

**Table S1. List of primers used in this study**

| <b>Mutation</b> | <b>Template</b>                        | <b>Primer (forward)</b>                             |
|-----------------|----------------------------------------|-----------------------------------------------------|
| K2              | pETHaPrP(23-231)                       | 5'-CATATGAAGGAGCGGCCAGAGCCTGGAG-3'                  |
| K2-E200K        | pETHaPrP(23-231) K2                    | 5'-GGAGAACTTCACGAAGACCGACATCAAG-3'                  |
| K2              | pcDNA-HaPrP(1-254)                     | 5'-GCCTCTGCAAGGAGCGGCCAGAGCCTGGAG-3                 |
| K4              | pETHaPrP(23-231)                       | 5'-GTGGAACGAGCCCAGTGAGCCAGAAACCAACATGGAGCACATGG-3'  |
| K4              | pcDNA-HaPrP(1-254)                     | 5'-CAGTGAACGAGCCTTCGGACCCAGAAACCAACATGGAGCACATGG-3' |
| K6              | pETHaPrP(23-231) K4                    | 5'-CATATGAAGGAGCGGCCAGAGCCTGGAG-3'                  |
| K6              | pcDNA-HaPrP(1-254) K4                  | 5'-GCCTCTGCAAGGAGCGGCCAGAGCCTGGAG-3                 |
| E200K           | pETHaPrP(23-231)<br>pcDNA-HaPrP(1-254) | 5'-GGAGAACTTCACGAAGACCGACATCAAG-3'                  |
| Q217R           | pETHaPrP(23-231)<br>pcDNA-HaPrP(1-254) | 5'-GTGTACCACCCGGTATCAGAAGGAG-3'                     |
| Q219K           | pETHaPrP(23-231)<br>pcDNA-HaPrP(1-254) | 5'-CAGATGTGTACCACCCAGTATAAGAAGGAG-3'                |
| E221K           | pETHaPrP(23-231)<br>pcDNA-HaPrP(1-254) | 5'- CAGTATCAGAAGAAGTCCCAGGCCTACTAC-3'               |
